# Supplementary material
Source: MDPI journal article supplement (https://www.mdpi.com/2075-163X/11/2/127)
Supplement: s1 [file SuplMat 1.xls]

## Sheet: List1
Supplementary electronic material 1
Bulk-rock chemical composition of studied samples (wt%, traces in ppm)
No	3361	3385	3365	3389	3413	3436	3443	4206	4208
SiO2	74.8	73.8	70.6	83.5	72.5	72.5	73.7	73.5	73.3
TiO2	0.05	0.06	0.04	0.05	0.01	0.02	0.04	0.05	0.06
Al2O3	13.8	14.6	14.7	11.6	16	15.1	14.1	14.9	14.2
Fe2O3	0.41	0.3	0.59	0.26	<0,01	0.34	0.22	0.51	0.37
FeO	0.46	0.88	4.6	0.26	0.55	0.58	0.79	0.5	0.78
MnO	0.03	0.02	0.09	0.02	0.04	0.02	0.03	0.08	0.08
MgO	0.05	0.04	0.02	0.01	0.04	0.05	0.06	0.03	0.03
CaO	0.43	0.39	0.6	0.28	0.17	0.44	0.4	0.48	0.58
Li2O	0.03	0.12	0.44	0.07	0.29	0.18	0.13	0.14	0.15
Na2O	3.6	3.19	0.08	0.03	4.89	3.77	3.51	3.44	3.29
K2O	4.23	4.46	2.63	0.3	3.51	4.32	4.29	4.38	4.56
P2O5	0.4	0.38	0.48	0.33	0.52	0.46	0.4	0.42	0.34
F	0.5	1.28	4.34	3.46	1.33	1.25	1.1	0.97	1.02
-F eq.	-0.21097	-0.540084	-1.83122	-1.45992	-0.561181	-0.527426	-0.464135	-0.409283	-0.43038
H2O	1.13	1.14	2.48	1.17	1.13	1.07	0.99	1.09	1.3
Sum	99.709	100.12	99.8588	99.8801	100.419	99.5726	99.2959	100.081	99.6296
Ba	23	15	29	73	9	4	7	10	13
Cs	56	149	253	30	159	82	96	93	96
Ga	31	33	60	6	52	39	32	34	36
Hf	2	2.2	2.2	2.4	1.8	1.9	1.9	2	2.1
Nb	58	28	38	18	54	39	29	28	28
Rb	672	1229	1752	249	2010	1428	1112	1095	1120
Sn	20	16	65	19	35	61	52	89	125
Sr	12	38	155	168	53	24	18	35	24
Ta	19	8.3	14	10	20	15	10	8.4	9
Th	7.5	6.2	5.2	6.8	6.3	5.3	5.9	6.3	7.9
U	43	44	14	32	12.7	35	35	45	61
W	24	43	99	90	23	38	25	14	8.5
Zr	31	38	26	37	25	34	37	30	41
Y	8.5	11.1	6.7	11.2	2.3	7.4	9.1	8.9	13.1
La	2.4	2.9	1.4	2.7	0.7	1.9	3	2.6	4.1
Ce	5.6	7	3.6	7.3	1.7	5	7.4	6.4	9.1
Pr	0.71	0.87	0.47	0.84	0.2	0.63	0.9	0.8	1.7
Nd	2.5	3.4	1.8	3.1	0.8	2	3.1	2.6	4.6
Sm	1.1	1.2	0.8	1.1	0.2	0.8	1	1	1.4
Eu	0.06	< 0,05	<0 ,05	<0 ,05	< 0,05	<0 ,05	<0 ,05	<0,05	<0,05
Gd	1.1	1.32	0.83	1.51	0.26	0.88	1.13	1.14	1.61
Tb	0.31	0.32	0.23	0.4	0.04	0.21	0.28	0.27	0.35
Dy	1.73	2	1.24	2.29	0.29	1.37	1.43	1.64	2.36
Ho	0.22	0.27	0.15	0.31	<0 ,05	0.2	0.27	0.23	0.34
Er	0.52	0.67	0.37	0.76	0.13	0.6	0.71	0.5	0.83
Tm	0.05	0.07	< 0,05	0.09	<0 ,05	0.08	0.08	0.07	0.13
Yb	0.45	0.52	0.32	0.64	0.13	0.53	0.53	0.56	0.68
Lu	0.06	0.06	0.04	0.09	< 0.01	0.06	0.07	0.07	0.10
