# Supplementary material
Source: MDPI journal article supplement (https://www.mdpi.com/2075-163X/11/2/127)
Supplement: s1 [file SuplMat 2.xls]

## Sheet: Monazite
Sample	P2O5	SiO2	ThO2	UO2	Al2O3	Y2O3	La2O3	Ce2O3	Pr2O3	Nd2O3	Sm2O3	Gd2O3	Tb2O3	Dy2O3	Ho2O3	Er2O3	Yb2O3	Lu2O3	CaO	FeO	PbO	Total
3436	30.05	0.38	22.35	3.21	0	2.36	4.67	15.89	2.09	7.44	2.72	1.95	0.24	0.72	0.05	0.05	0	0	4.96	0	0.45	99.58
3436	30.02	0.39	23	3.38	0	2.43	4.53	15.25	2.06	7.23	2.67	1.9	0.14	0.72	0.08	0.1	0	0	5.17	0	0.44	99.51
3436	29.95	0.48	23.26	3.87	0	2.45	4.4	14.98	1.92	7.15	2.63	1.85	0.23	0.68	0.05	0.24	0	0	5.31	0	0.45	99.9
3436	30.09	0.39	23.33	4.47	0	2.29	4.37	14.57	1.97	6.84	2.34	1.82	0.21	0.59	0.02	0.21	0	0	5.44	0	0.6	99.55
3436	29.9	0.45	15.17	3.66	0	3.3	7.05	19.66	2.49	8.46	2.32	1.88	0.23	0.88	0.07	0.24	0.04	0	3.63	0	0.38	99.81
3436	30	0.4	13.88	3.74	0	3.51	7.35	19.95	2.38	8.77	2.37	1.89	0.24	1.01	0.1	0.27	0.06	0	3.39	0	0.35	99.66
3436	30.03	0.46	15.2	3.5	0	2.88	6.82	19.86	2.54	8.93	2.39	1.83	0.22	0.86	0.02	0.27	0.04	0	3.71	0.04	0.32	99.92
3436	29.73	0.67	12.04	1.42	0	3.37	7.62	22.87	2.68	9.57	2.78	2.4	0.28	0.93	0.08	0.25	0.02	0	2.56	0	0.26	99.53
3436	29.33	0.76	17.87	1.91	0	3.32	5.99	18.83	2.36	9.19	2.59	2.59	0.38	1.13	0.1	0.26	0.02	0	3.68	0	0.26	100.57
3436	29.72	0.55	11.25	1.62	0	4.52	7.73	22.13	2.53	9.85	2.8	2.73	0.3	1.14	0.14	0.28	0.06	0	2.31	0	0.22	99.88
3436	30.29	0.35	8.33	5.59	0	4.16	7.25	21.85	2.59	9.31	2.68	2.16	0.35	1.06	0.11	0.25	0.04	0	2.91	0	0.37	99.65
3443	30.03	0.51	14.67	1.49	0	2.15	6.07	21.97	2.96	10.46	2.92	1.95	0.27	0.68	0.06	0.16	0	0	3.17	0	0.28	99.8
3443	29.76	0.49	21.16	1.85	0	2.06	5.1	17.26	2.2	8.27	2.6	1.7	0.17	0.47	0.04	0.21	0.06	0	4.89	0	0.24	98.53
3443	29.69	0.5	19.63	1.91	0	2.2	5.46	18.41	2.37	8.74	2.8	1.87	0.3	0.68	0.05	0.12	0	0	4.38	0	0.28	99.39
3443	29.71	0.49	7.51	0.77	0	1.9	13.4	27.79	2.76	9.96	1.59	1.31	0.11	0.36	0	0.12	0.05	0	1.5	0	0.14	99.47
3443	29.78	0.53	6.65	0.54	0	1.63	13.93	28.74	2.94	10.51	1.51	1.19	0.12	0.41	0	0.07	0	0	1.24	0	0.11	99.9
3361	29.77	0.45	18.52	2.6	0	2.38	5.73	18.23	2.33	8.97	3.14	2.28	0.28	0.87	0.03	0.15	0	0	4.09	0	0.37	100.19
3361	29.84	0.4	21.29	2.91	0	2.6	4.78	16.39	2.11	7.81	3.18	2.24	0.34	0.84	0.05	0.19	0.03	0	4.66	0	0.38	100.04
3361	29.72	0.43	19.26	2.12	0	2.47	4.19	17.45	2.36	9.15	3.75	2.63	0.37	0.84	0.06	0.22	0.05	0	4.11	0	0.36	99.54
3361	30.07	0.37	17.31	3.95	0	2.65	4.49	17.24	2.4	8.79	3.74	2.43	0.31	0.85	0	0.12	0.03	0	4.19	0	0.42	99.36
3361	29.85	0.53	14.95	2.46	0	3.12	6.99	20.18	2.4	9.18	2.66	2.33	0.28	0.86	0.03	0.17	0.03	0	3.22	0	0.3	99.54
3361	29.8	0.45	14.66	2.28	0	2.99	7.47	20.79	2.54	9.07	2.77	2.24	0.31	0.96	0.07	0.24	0	0	3.18	0	0.31	100.13
3361	29.66	0.45	14.11	2.19	0	3.01	7.5	21.05	2.62	9.62	2.73	2.25	0.35	0.9	0.08	0.29	0	0	3.03	0	0.31	100.15
3361	29.74	0.37	15.7	3.78	0	3.08	6.55	19.35	2.35	8.15	2.7	2.22	0.36	0.97	0.07	0.21	0.03	0	3.73	0	0.38	99.74
3361	29.57	0.61	13.93	2.32	0	3.28	7.4	21.65	2.54	9.23	2.73	2.21	0.27	0.93	0.05	0.12	0	0	3	0	0.25	100.09
3361	30.07	0.48	15.79	3.89	0	3.47	6.41	18.78	2.31	8.31	2.78	2.33	0.38	1.08	0.07	0.26	0	0	3.78	0	0.36	100.55
3385	29.77	0.47	14.16	2.16	0	2.44	5.49	21.25	2.86	10.32	3.48	2.3	0.31	0.79	0.05	0.16	0	0	3.18	0	0.28	99.47
3385	30.04	0.49	11.18	2.88	0	3.11	6.51	21.83	2.71	9.75	3.05	2.21	0.26	0.86	0.06	0.24	0.03	0	2.85	0	0.29	98.35
3385	29.77	0.52	13.68	1.84	0	3.12	8.04	21.16	2.46	9.36	2.66	2.28	0.29	0.87	0.09	0.16	0	0	2.82	0	0.28	99.4
3385	29.7	0.49	13.21	1.94	0	3.09	7.96	21.61	2.58	9.56	2.63	2.14	0.37	0.84	0.07	0.12	0	0	2.85	0	0.26	99.42
3385	29.7	0.46	17.46	2.32	0	2.7	6.35	19.43	2.22	8.54	2.78	2.26	0.31	0.9	0.07	0.19	0	0	3.69	0	0.34	99.72
3385	29.78	0.46	18.09	2.27	0	2.65	5.99	18.79	2.38	8.3	3.11	2.31	0.34	0.84	0.08	0.12	0	0	3.83	0	0.34	99.68
3385	29.74	0.47	17.37	2.23	0	2.66	6.3	19.27	2.38	8.36	2.87	2.3	0.25	0.79	0.06	0.2	0.06	0	3.71	0	0.32	99.34
3385	29.73	0.45	17.53	2.27	0	2.74	6.27	18.78	2.34	8.62	2.91	2.32	0.37	0.88	0.09	0.19	0	0	3.76	0	0.33	99.58
3385	29.9	0.43	14.8	1.86	0	2.73	8.24	21.2	2.47	9.11	2.46	1.93	0.3	0.75	0.03	0.17	0.05	0	2.95	0	0.27	99.65
3385	29.78	0.42	19.23	2.8	0	2.8	6.04	17.47	2.17	8	2.62	2.2	0.28	0.83	0.09	0.1	0	0	4.15	0	0.38	99.36
3413	30.13	0.21	44.73	6.32	0	0	0.94	3	0.41	1.66	0.41	0.21	0.06	0.07	0	0.05	0	0	10.63	0	0.88	99.71
3413	30.11	0.13	49.63	6.34	0	0	0.18	0.42	0.04	0.15	0.06	0	0	0	0	0	0	0	11.16	0	0.92	99.14
3413	30.23	0.13	50.11	6.4	0	0.02	0.28	0.54	0.02	0.12	0.15	0	0	0	0	0	0	0	11.28	0	0.95	100.23
3413	29.56	0.12	58.33	0.05	0	0.12	0	0.04	0	0.08	0.02	0.05	0	0.08	0	0	0	0	11.11	0	0.15	99.71
3413	29.4	0.13	59.33	0.04	0	0.12	0	0.06	0	0	0	0.04	0	0.04	0	0	0	0	11.1	0	0.12	100.38
3365	29.77	0.33	18.29	4.49	0	3.81	5.16	16.06	1.95	6.91	2.71	2.36	0.24	1.26	0.18	0.25	0.05	0	4.59	0	0.44	98.85
3365	30.03	0.33	18.65	3.83	0	3.41	5.21	16.81	2.13	7.41	3	2.44	0.37	1.15	0.15	0.21	0.03	0	4.53	0	0.42	100.11
3365	29.3	0.5	22.51	3.43	0	2.57	4.58	15.42	1.88	7.14	2.75	2.17	0.24	1.02	0.09	0.21	0.04	0	4.83	0	0.38	99.06
3365	30.08	0.26	18.02	4.86	0	3.95	4.89	15.76	2.02	6.95	2.87	2.48	0.43	1.31	0.12	0.22	0.02	0	4.65	0	0.44	99.33
3365	30.07	0.26	19.07	4.81	0	3.77	4.99	15.66	2.03	6.85	2.78	2.3	0.36	1.16	0.1	0.29	0	0	4.92	0	0.47	99.89
3365	30.04	0.29	19.24	4.09	0	3.39	5.41	16.57	2.05	6.93	2.7	2.41	0.24	1.15	0.06	0.29	0	0	4.72	0	0.4	99.98
3365	30.04	0.34	19.43	3.85	0	3.05	5.34	16.68	2.09	6.93	2.75	2.3	0.31	0.89	0.08	0.26	0.05	0	4.69	0	0.42	99.5
3365	30	0.34	31.35	3.61	0	2.36	4.71	11.41	1.39	4.34	1.55	1.16	0.07	0.46	0.04	0.04	0.02	0	6.79	0	0.58	100.22
3365	30.04	0.32	20.76	3.66	0	3.03	4.89	15.73	1.95	6.99	2.82	2.11	0.42	0.98	0.09	0.27	0	0	4.95	0	0.43	99.44
3365	30.09	0.29	19.78	5.25	0	3.8	4.73	14.67	1.88	6.52	2.6	2.36	0.41	1.24	0.08	0.24	0.05	0	5.26	0	0.51	99.76
3365	30.08	0.26	18.54	5.17	0	4.01	4.86	15.58	1.84	6.57	2.77	2.5	0.44	1.35	0.16	0.2	0.03	0	5.01	0	0.49	99.86
3365	30.07	0.3	20.38	4.96	0	3.82	4.81	15.1	1.82	6.55	2.68	2.28	0.26	1.18	0.05	0.25	0.02	0	5.28	0	0.51	100.32
3365	30	0.42	21.61	4.12	0	3.14	4.83	15.01	1.76	6.63	2.56	2.11	0.25	1	0.16	0.2	0.05	0	5.19	0	0.47	99.51
3365	29.28	0.3	23.87	3.97	0.06	2.75	4.58	13.67	1.43	4.69	1.79	1.63	0.16	0.74	0.12	0.18	0.06	0	4.78	0.94	0.5	95.5
3365	27.04	0.29	26.02	2.6	1.31	1.02	1.35	4.94	0.62	2.52	1.04	0.74	0.11	0.18	0	0.14	0	0	5.11	1.17	0.54	76.74
3365	27.03	0.17	24.36	2.81	0.97	2.02	3.27	8.16	1.08	3.29	1.48	0.97	0.2	0.47	0.08	0.02	0	0	4.8	0.56	0.57	82.31
3365	26.14	0.33	22.37	3.2	0.46	2.13	2.6	6.36	1.59	6.25	2.23	1.45	0.25	0.7	0	0.17	0.02	0	4.93	0.62	0.73	82.53
3365	25.65	0.13	42.95	0.85	0.1	0.43	0.43	3.56	0.42	3.51	0.71	0.48	0	0.13	0	0	0	0	8.81	0.99	0.16	89.31
3365	28.49	0.64	37.57	2.67	0.15	0.6	3.45	7.98	0.69	2.58	0.92	0.68	0.04	0.34	0	0	0	0	7.67	1.71	0.48	96.66
3389	29.89	0.4	25	5.02	0	2.72	2.79	12.53	1.82	6.27	3.15	2.34	0.35	0.88	0.08	0.11	0	0	6.04	0.02	0.58	99.99
4206	28.065	0.67	6.335	0.132		1.216	13.205	31.682	3.47	10.827	1.496	0.952	0	0.206		0	0.055		0.909	0	0.053	99.273
4206	27.757	0.372	18.206	3.785		2.851	5.146	18.553	2.349	7.62	2.319	1.752	0.035	0.886		0.325	0.056		5.224	0.292	0.261	97.789
4206	28.813	0.393	8.302	2.516		7.743	6.148	22.146	2.908	9.189	3.032	3.448	0.202	1.903		0.452	0.013		2.194	0.286	0.228	99.916
4206	28.147	0.371	16.322	3.648		3.562	5.921	19.951	2.532	8.029	2.368	1.988	0.116	0.986		0.118	0.019		4.22	0.057	0.35	98.705
4206	28.631	0.336	15.748	2.928		2.965	6.7	21.694	2.462	7.929	2.384	1.85	0.095	0.863		0.104	0.164		3.972	0.095	0.303	99.223
4206	28.385	0.359	14.889	3.328		3.163	6.375	21.316	2.505	8.447	2.449	1.881	0.052	0.826		0.141	0.016		3.961	0.169	0.321	98.583
4206	27.613	0.42	14.36	2.536		2.781	6.939	21.504	2.652	8.337	2.422	1.756	0	0.607		0.049	0.048		3.75	0.632	0.248	96.654
4208	28.259	0.582	14.466	3.015		3.763	6.917	21.868	2.684	8.332	2.479	2.092	0	0.819		0.125	0.077		3.328	0.794	0.299	99.899
4208	28.455	0.436	9.506	0.843		2.736	9.335	26.609	3.18	10.702	2.624	2.196	0.064	0.751		0	0		1.925	0.013	0.136	99.511
4208	27.669	0.546	7.533	0.51		1.865	11.487	30.002	3.381	10.295	1.935	1.446	0.006	0.498		0.026	0		1.431	0	0.097	98.727
4208	27.665	0.659	5.966	0.262		1.054	13.771	32.065	3.512	10.552	1.447	0.806	0	0.342		0	0		0.89	0.016	0.038	99.045
4208	27.664	0.772	5.595	0.092		0.764	14.94	33.208	3.362	10.435	1.248	0.681	0	0.012		0.021	0.012		0.811	0.049	0.069	99.735
Remark:	0 = below detection limit

## Sheet: Xenotime
sample	P2O5	SiO2	ZrO2	ThO2	UO2	Al2O3	Y2O3	La2O3	Ce2O3	Pr2O3	Nd2O3	Sm2O3	Gd2O3	Tb2O3	Dy2O3	Ho2O3	Er2O3	Tm2O3*	Yb2O3	Lu2O3	CaO	FeO	PbO	sum
3443	33.6	0.9		0.66	5.18	0	41.32	0	0.09	0.04	0.47	0.35	3.3	0.7	5.71	0.88	2.62	0.35	1.97	0.3	0.7	0	0	99.14
3443	33.37	1.17		1.04	3.73	0	41.28	0	0.11	0.05	0.43	0.53	3.55	0.7	5.88	0.96	2.65	0.39	2.08	0.37	0.67	0	0.15	99.11
3436	33.46	1.21		1	5.39	0	40.96	0.02	0.15	0.04	0.43	0.46	3.38	0.71	5.71	1.01	2.71	0.36	2.09	0.35	0.48	0	0.25	100.17
3436	33.54	1.19		0.97	4.98	0	41.49	0	0.1	0.05	0.42	0.41	3.23	0.84	5.9	0.94	2.77	0.37	2.18	0.3	0.49	0	0.22	100.39
3361	34.34	0.56		1.3	3.62	0	43.04	0	0	0	0	0	2.21	0.64	5.36	0.84	2.7	0.4	2.6	0.36	0.8	0	0.15	98.92
3361	32.33	1.43		2.04	4.31	0	39.42	0	0.1	0.04	0.55	0.57	3.79	0.85	5.97	0.95	2.55	0.31	1.52	0.21	0.73	0	0.18	97.85
3361	33.78	0.74		0.88	3.96	0	41.2	0	0.05	0.02	0.36	0.54	3.85	1.07	6.73	0.86	2.1	0.31	1.97	0.34	0.46	0	0.15	99.37
3361	34.55	0.23		0.46	3.16	0	42.85	0	0.05	0	0.32	0.82	4.12	1.15	6.88	0.85	1.91	0.25	1.36	0.29	0.35	0	0.13	99.73
3361	34.4	0.58		0.66	3.29	0	41.56	0	0.05	0	0.29	0.53	4.06	0.96	6.81	0.87	2.26	0.3	1.75	0.3	0.54	0	0.12	99.33
3361	34.63	0.5		0.39	4.87	0	40.66	0	0.12	0.04	0.3	0.42	3.77	0.98	6.58	0.8	2.2	0.31	1.82	0.33	0.96	0	0.13	99.81
3361	34.62	0.57		0.42	5.13	0	39.75	0	0.09	0.05	0.36	0.45	3.87	0.92	6.54	0.79	2.03	0.27	1.64	0.32	0.98	0	0.17	98.97
3361	33.7	1.04		1.02	3.73	0	40.74	0	0.05	0	0.18	0.33	3.6	0.91	6.46	0.8	2.1	0.28	1.68	0.27	0.83	0	0.12	97.84
3361	34.37	0.58		0.75	3.67	0	42.35	0	0.08	0.05	0.33	0.45	3.85	1.04	6.65	0.84	2.23	0.31	1.91	0.32	0.58	0	0.13	100.49
3385	34.16	0.65		0.57	3.26	0	42.42	0	0.05	0.03	0.29	0.32	3.68	0.81	6.42	1.04	2.72	0.33	1.67	0.29	0.35	0	0.17	99.23
3385	34.22	0.41		0.54	2.7	0	42.65	0	0.06	0	0.31	0.45	3.74	0.94	6.41	0.98	2.85	0.34	1.71	0.29	0.59	0	0.12	99.31
3385	34.56	0.48		0.56	2.93	0	42.8	0	0.05	0	0.4	0.43	3.82	0.81	6.5	0.98	2.87	0.34	1.66	0.29	0.64	0	0.1	100.22
4206	33.233	0.734	0	0.772	4.019		44.375	0.026	0.122	0	0.364	0.736	2.544	0.829	6.626	1.428	3.055		2.243	0.374	0.423		0.18	102.083
4206	33.852	0.678	0	0.577	3.253		45.163	0	0.09	0.055	0.428	0.84	2.484	0.922	6.204	1.253	2.967		2.25	0.329	0.44		0.103	101.888
4206	33.273	0.58	0.445	0.546	2.795		45.037	0	0.053	0	0.273	0.712	2.506	0.717	6	1.137	3.057		2.214	0.206	0.451		0.081	100.083
4206	31.647	0.701	1.684	1.129	4.776		40.012	0	0.021	0.099	0.121	0.525	1.968	0.499	5.005	1.265	2.923		2.506	0.165	1.522		0.189	96.757
4208	33.908	0.646	0	0.907	2.808		46.733	0.041	0.141	0	0.518	0.834	2.631	0.594	6.214	1.126	3.017		1.377	0	0.324		0.169	101.988
4208	32.361	0.715	0	1.018	3.143		46.028	0.016	0.196	0.11	0.449	0.905	2.602	0.776	6.24	1.276	3.141		1.508	0	0.287		0.11	100.881
Remark:	a = Tm concentrations calculated from normalized abundances of neighboring elements Dy and Er.

## Sheet: Uraninite
sample	P2O5	SiO2	ThO2	UO2	Y2O3	La2O3	Ce2O3	Pr2O3	Nd2O3	Sm2O3	Gd2O3	Tb2O3	Dy2O3	Ho2O3	Er2O3	Yb2O3	Lu2O3	CaO	FeO	PbO	sum
3365	0	0.07	5.23	89.72	0.12		0		0	0	0	0	0.05	0	0.05	0.03				4.13	99.4
3365	0	0	5.32	88.66	0.11		0.05		0	0.15	0.07	0.01	0.06		0.11	0.04		0		4.07	98.65
3389	0	0	4.47	89.77	0.14		0		0.05	0.1	0.05	0.04	0.09		0.1	0		0		4.05	98.86
3436	0	0	1.55	92.55	0.05		0.04		0.06	0	0	0	0		0	0.04		0		4.14	98.43
3436	0	0.06	1.8	92.48	0.1		0.08		0	0	0.1	0.05	0.05		0.06	0		0		4.11	98.89
3436	0	0.06	3.78	90.72	0.13		0		0.02	0	0.02	0	0		0.04	0		0		4.07	98.84
3436	0	0.03	2.13	92.65	0.06		0.06		0	0	0	0	0.06		0.06	0		0		4.06	99.11
3436	0	0	2.15	92.66	0.11		0		0	0	0.08	0	0.12		0	0		0		4.11	99.23
3436	0	0	3.28	90.54	0.14		0.04		0.07	0.05	0.06	0	0		0.08	0.03		0		4.06	98.35
3436	0	0	2.06	93.37	0.05		0.02		0	0	0	0	0		0	0		0		4.19	99.69
3436	0	0	3.35	90.98	0.12		0.01		0.07	0.1	0	0.03	0.13		0.08	0.04		0		4.06	98.97
3436	0	0	4.48	90.08	0.18		0.05		0	0.06	0	0.1	0.09		0	0		0		3.97	99.01
3436	0	0	4.3	90.8	0.03		0		0	0	0.04	0.08	0		0.13	0		0		4.07	99.45
3436	0	0	3.64	91.45	0.12		0.03		0.11	0.03	0	0.01	0.06	0	0.02	0		0		4.01	99.48
3443	0	0.06	2.47	91.16	0.19		0		0.01	0.03	0	0	0.09	0	0.03	0		0		3.97	98.01
3443	0	0	2.34	91.48	0.22		0.02		0	0.05	0.09	0	0.08	0	0.1	0		0		3.98	98.36
